# Supplementary material
Source: PubMed Central journal article supplement (PMC4338608)

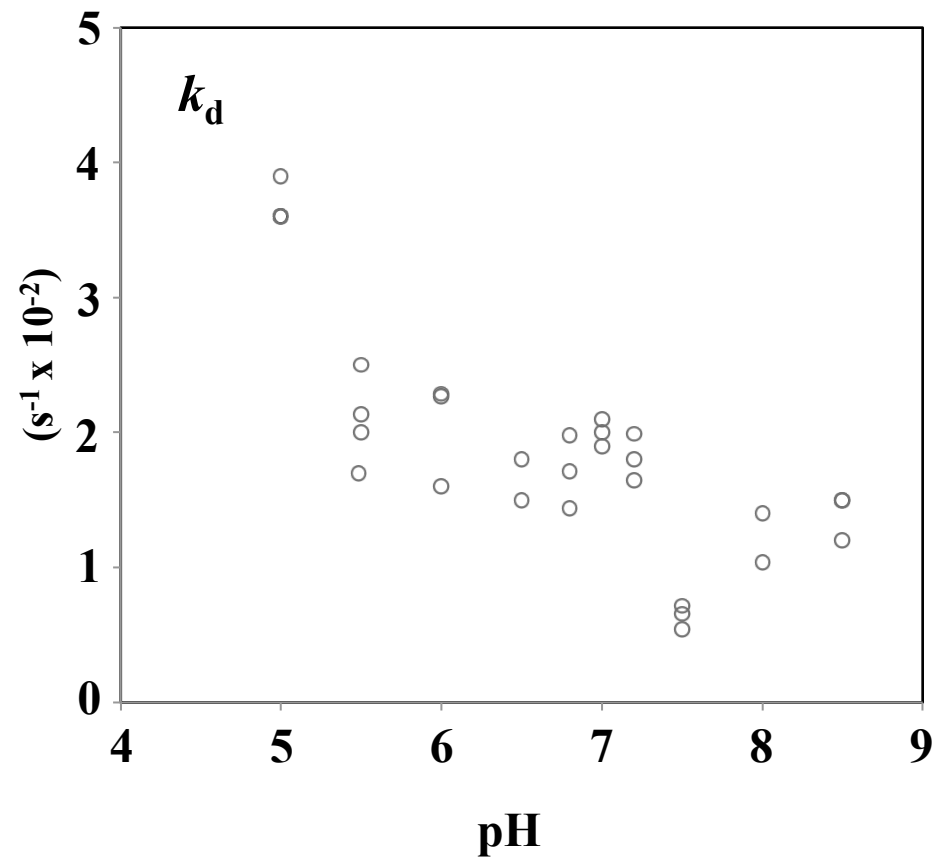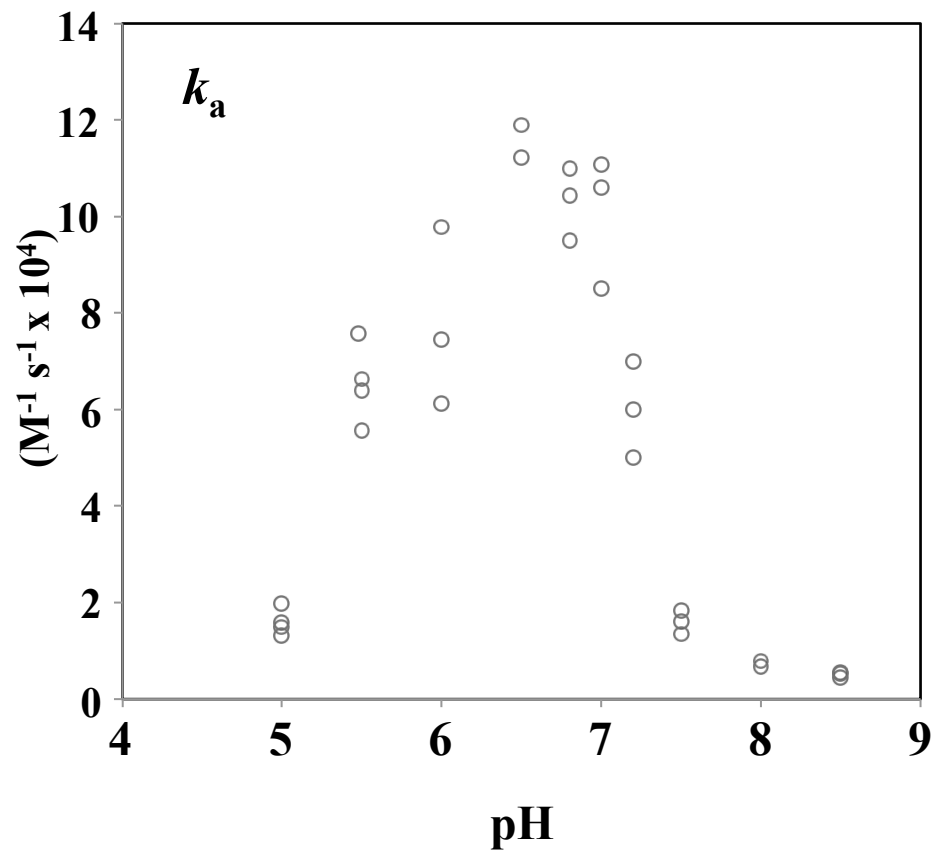

Supplement: NIHMS664696-supplement-Figure_S1.pdf [file NIHMS664696-supplement-Figure_S1.pdf]

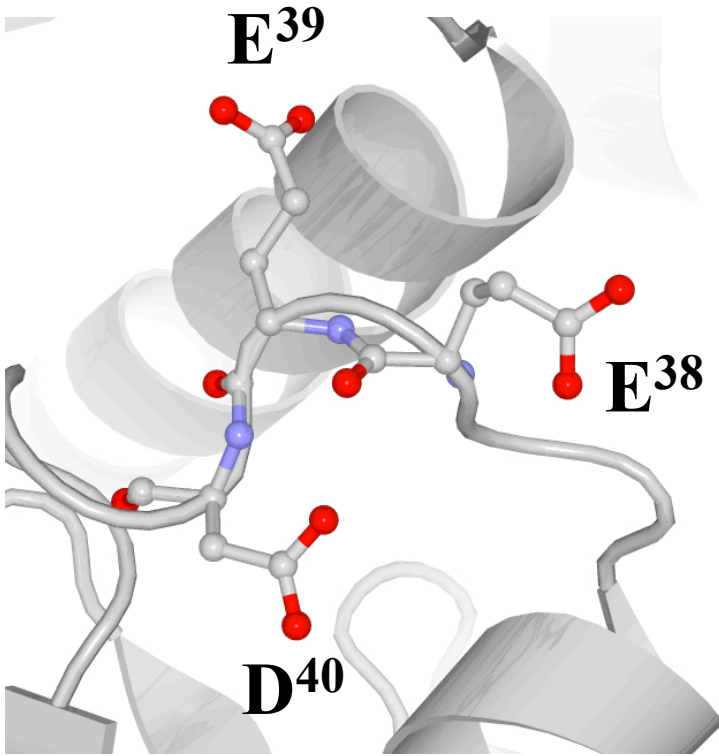

**4.1R**

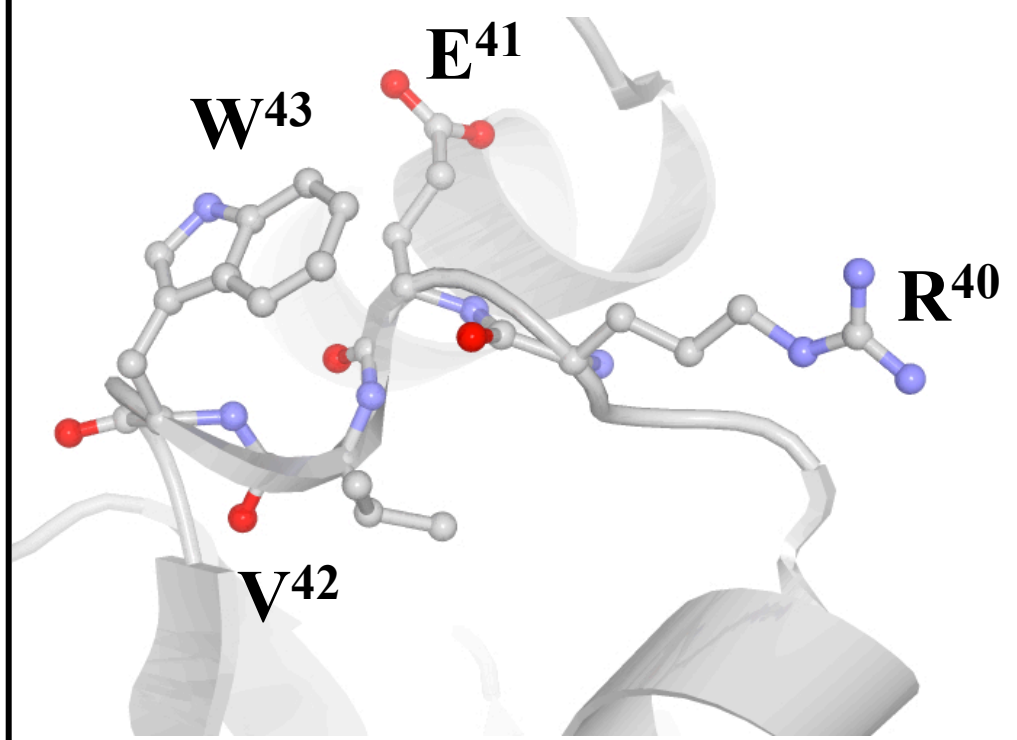

**ezrin**

Supplement: NIHMS664696-supplement-Figure_S2.pdf [file NIHMS664696-supplement-Figure_S2.pdf]
